# Supplementary material for: Augmentation of inductive effects through short range intramolecular hydrogen bonds for the improvement of cooperativity of trimeric rosettes
Source: Royal Society of Chemistry journal article supplement (doi:10.1039/d4me00008k), 2024-01-01
Supplement: d4me00008k1.pdf [file d4me00008k1.pdf]

## Supporting Information

---

### Augmentation of inductive effects through short range intramolecular hydrogen bonds for the improvement of cooperativity of trimeric rosettes

Andre Nicolai Petelski,<sup>1,\*</sup> Tamara Bundrea,<sup>1</sup> Nélida María Peruchena<sup>2</sup>

<sup>a</sup>Departamento de Ingeniería Química, Universidad Tecnológica Nacional (UTN), Facultad Regional Resistencia (FRRe), CONICET, Centro de Investigación en Química e Ingeniería Teórica y Experimental (QUITEX), French 802, H3500CHJ, Resistencia, Chaco, Argentina.

<sup>b</sup>Laboratorio de Estructura Molecular y Propiedades (LEMyP), Instituto de Química Básica y Aplicada del Nordeste Argentino (IQUIBA-NEA), Consejo Nacional de Investigaciones Científicas y Técnicas, Universidad Nacional del Nordeste (UNNE-CONICET), Avenida Libertad 5460, 3400 Corrientes, Argentina.

---

#### **Content**

---

|                                                                         |    |
|-------------------------------------------------------------------------|----|
| RMSD of interatomic distances                                           | S2 |
| Bonding analysis                                                        | S2 |
| LMOEDA analysis                                                         | S2 |
| Average distances of trimers                                            | S2 |
| (1-P35*) <sub>3</sub> and (1-P35* <sub>syn</sub> ) <sub>3</sub> trimers | S3 |
| Cartesian coordinates                                                   | S3 |

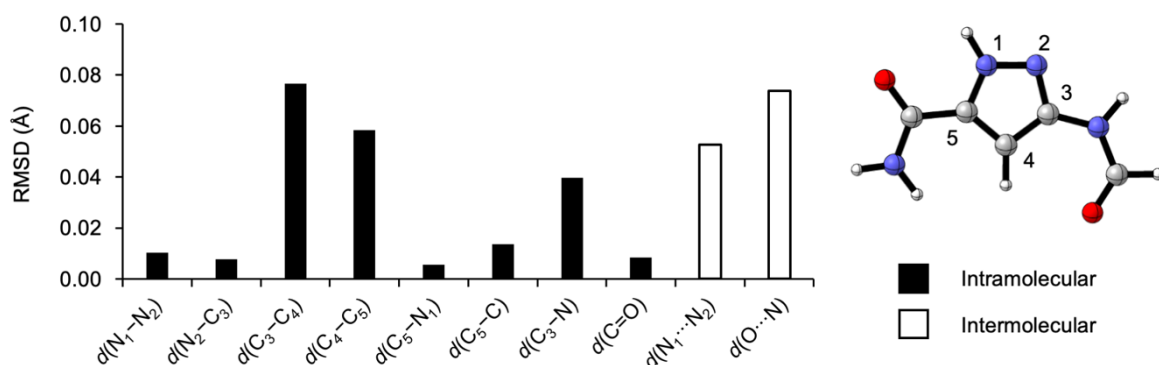

**Figure S1.** Average RMSDs (in Å) for relevant interatomic distances of (b-P35)<sub>3</sub> trimer relative to the experimental X-ray structure.

**Table S1.** Bonding analysis of trimers (in kcal mol<sup>-1</sup>) computed at BLYP-D3(BJ)/6-311++G(d,p)

| Trimer                               | $\Delta E_{\text{bond}}$ | $\Delta E_{\text{strain}}$ | $\Delta E_{\text{int}}$ | $\Delta E_{\text{coop}}$ |
|--------------------------------------|--------------------------|----------------------------|-------------------------|--------------------------|
| (a-P35) <sub>3</sub>                 | -39.9                    | 2.8                        | -42.8                   | 0.4                      |
| (b-P35) <sub>3</sub>                 | -43.9                    | 3.5                        | -47.4                   | 0.3                      |
| (c-P35) <sub>3</sub>                 | -51.2                    | 4.2                        | -55.5                   | 0.2                      |
| (a-P35 <sub>syn</sub> ) <sub>3</sub> | -63.1                    | 2.1                        | -65.3                   | -12.6                    |
| (b-P35 <sub>syn</sub> ) <sub>3</sub> | -76.0                    | 2.9                        | -78.9                   | -13.7                    |
| (c-P35 <sub>syn</sub> ) <sub>3</sub> | -86.5                    | 5.2                        | -91.7                   | -17.4                    |

**Table S2.** Local molecular orbital energy decomposition analysis (LMOEDA) of trimers (in kcal mol<sup>-1</sup>) computed at BLYP-D3(BJ)/6-311++G(d,p).

| Trimer                               | $\Delta E_{\text{int}}$ | $\Delta E_{\text{ele}}$ | $\Delta E_{\text{ex}}$ | $\Delta E_{\text{rep}}$ | $\Delta E_{\text{ex+rep}}$ | $\Delta E_{\text{pol}}$ | $\Delta E_{\text{disp}}$ |
|--------------------------------------|-------------------------|-------------------------|------------------------|-------------------------|----------------------------|-------------------------|--------------------------|
| (a-P35) <sub>3</sub>                 | -47.1                   | -54.1                   | -17.7                  | 112.7                   | 95.0                       | -67.7                   | -20.2                    |
| (b-P35) <sub>3</sub>                 | -52.4                   | -48.0                   | -18.6                  | 119.2                   | 100.6                      | -83.7                   | -21.4                    |
| (c-P35) <sub>3</sub>                 | -60.7                   | -53.6                   | -21.2                  | 133.1                   | 111.9                      | -96.3                   | -22.7                    |
| (a-P35 <sub>syn</sub> ) <sub>3</sub> | -69.8                   | -67.4                   | -19.4                  | 121.7                   | 102.3                      | -83.2                   | -21.5                    |
| (b-P35 <sub>syn</sub> ) <sub>3</sub> | -84.1                   | -69.1                   | -22.1                  | 137.0                   | 114.9                      | -106.5                  | -23.4                    |
| (c-P35 <sub>syn</sub> ) <sub>3</sub> | -97.3                   | -79.1                   | -26.7                  | 160.5                   | 133.8                      | -126.6                  | -25.5                    |

**Table S3.** Average distances (in Å) between heavy atoms of N-H...N and N-H...O hydrogen bonds within the trimers. Computed at BLYP-D3(BJ)/6-311++G(d,p).

| Trimer                               | $d(N...N)$ | $d(N...O)$ |
|--------------------------------------|------------|------------|
| (a-P35) <sub>3</sub>                 | 2.905      | 2.908      |
| (b-P35) <sub>3</sub>                 | 2.965      | 2.797      |
| (c-P35) <sub>3</sub>                 | 2.900      | 2.697      |
| (a-P35 <sub>syn</sub> ) <sub>3</sub> | 2.885      | 2.874      |
| (b-P35 <sub>syn</sub> ) <sub>3</sub> | 2.918      | 2.755      |
| (c-P35 <sub>syn</sub> ) <sub>3</sub> | 2.899      | 2.697      |

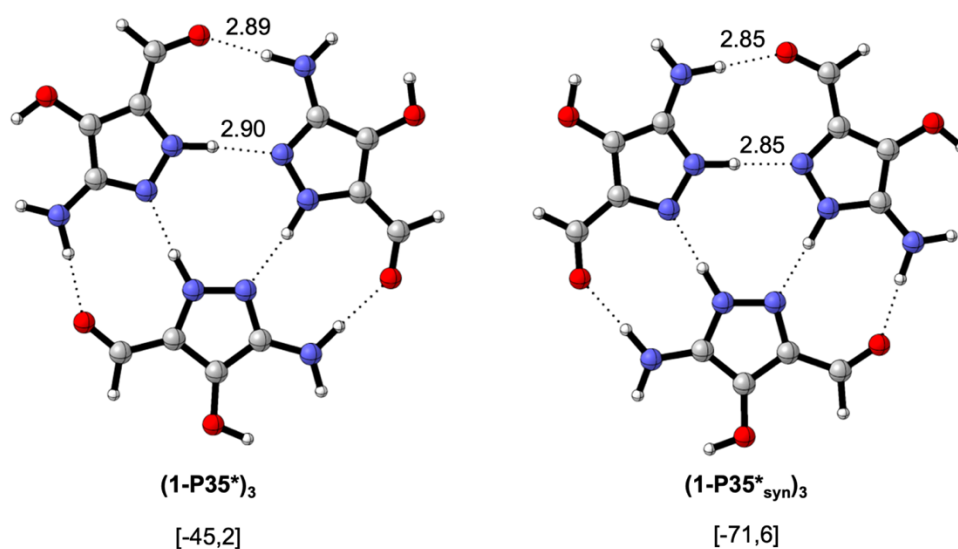

**Figure S2.** Molecular structures of  $(1\text{-P35}^*)_3$  and  $(1\text{-P35}^*_{\text{syn}})_3$  trimers with  $R_3 = \text{OH}$  optimized at BLYP-D3(BJ)/6-311++G(d,p). Interaction energies (between brackets) are in kcal mol<sup>-1</sup> and hydrogen bond distances (N/O...N) are in Å.

**Table S4.** Cartesian coordinates (in Å) and total electronic energy (in Hartrees) of all monomers and trimers optimized at BLYP-D3(BJ)/6-311++G(d,p).

a-P35 monomer

HF = -394.9069024

|   |           |           |          |
|---|-----------|-----------|----------|
| H | -2.063517 | 0.215040  | 0.000000 |
| C | 0.000000  | 0.755697  | 0.000000 |
| C | 1.129355  | -0.079521 | 0.000000 |
| C | 0.601739  | -1.400404 | 0.000000 |
| N | -0.756477 | -1.393825 | 0.000000 |
| N | -1.089640 | -0.073717 | 0.000000 |
| H | 2.168592  | 0.231521  | 0.000000 |
| H | 0.835036  | 2.767424  | 0.000000 |
| H | 2.298294  | -2.617173 | 0.000000 |
| O | -1.213462 | 2.800534  | 0.000000 |
| C | -0.132024 | 2.210686  | 0.000000 |
| N | 1.288894  | -2.596858 | 0.000000 |
| H | 0.775433  | -3.469024 | 0.000000 |

a-P35<sub>syn</sub> monomer

HF = -394.8947621

|   |           |           |          |
|---|-----------|-----------|----------|
| H | -1.678330 | -1.851681 | 0.000000 |
| C | 0.438947  | -1.451829 | 0.000000 |
| C | 1.069529  | -0.209199 | 0.000000 |
| C | 0.000000  | 0.743495  | 0.000000 |
| N | -1.213285 | 0.153452  | 0.000000 |
| N | -0.913872 | -1.182246 | 0.000000 |
| N | 0.936140  | -2.740057 | 0.000000 |
| C | 0.174284  | 2.212158  | 0.000000 |
| O | -0.716622 | 3.050083  | 0.000000 |
| H | 2.135972  | -0.011952 | 0.000000 |
| H | 0.328155  | -3.548058 | 0.000000 |
| H | 1.934814  | -2.894974 | 0.000000 |
| H | 1.252918  | 2.520220  | 0.000000 |

## b-P35 monomer

HF = -563.6612022

|   |           |           |           |
|---|-----------|-----------|-----------|
| C | -1.065355 | -0.135935 | -0.000010 |
| C | 0.200189  | 0.462288  | 0.000205  |
| C | 1.097970  | -0.636271 | 0.000018  |
| N | -0.853844 | -1.487081 | 0.000034  |
| H | -1.583869 | -2.195555 | -0.000017 |
| H | 0.467424  | 1.510469  | 0.000305  |
| N | 0.458959  | -1.826962 | 0.000155  |
| C | -2.465527 | 0.368892  | -0.000119 |
| O | -3.426413 | -0.411336 | -0.000200 |
| N | -2.604139 | 1.735814  | 0.000098  |
| H | -3.542445 | 2.124440  | 0.000155  |
| H | -1.805943 | 2.362303  | 0.000308  |
| N | 2.503024  | -0.636707 | -0.000041 |
| C | 3.320058  | 0.477753  | -0.000073 |
| H | 2.945313  | -1.554989 | -0.000051 |
| O | 2.935676  | 1.642653  | -0.000103 |
| H | 4.393417  | 0.186989  | -0.000117 |

b-P35<sub>syn</sub> monomer

HF = -563.6428887

|   |           |           |           |
|---|-----------|-----------|-----------|
| C | 1.096174  | -0.605064 | 0.000388  |
| C | 0.161276  | 0.422701  | -0.000501 |
| C | -1.104628 | -0.244896 | -0.000285 |
| N | 0.380572  | -1.781590 | 0.001120  |
| H | 0.732779  | -2.734309 | 0.001886  |
| H | 0.398432  | 1.477713  | -0.001459 |
| N | -0.968248 | -1.584005 | 0.000733  |
| C | -2.487244 | 0.352568  | -0.001098 |
| O | -3.516481 | -0.319566 | -0.002321 |
| N | -2.507918 | 1.736278  | 0.001600  |
| H | -3.413679 | 2.194831  | 0.002010  |
| H | -1.668443 | 2.304618  | 0.004301  |
| N | 2.498908  | -0.605113 | 0.000548  |
| C | 3.300785  | 0.531738  | -0.000013 |
| H | 2.979411  | -1.502819 | 0.001084  |
| O | 2.887979  | 1.682121  | -0.001024 |
| H | 4.378151  | 0.258253  | -0.000023 |

## c-P35 monomer

HF = -638.9122575

|   |           |           |           |
|---|-----------|-----------|-----------|
| C | -1.147798 | 0.283864  | -0.000174 |
| C | 0.127080  | -0.302791 | -0.000430 |
| C | 1.024109  | 0.807385  | -0.000174 |
| N | -0.939302 | 1.641657  | 0.000069  |
| H | -1.675021 | 2.343596  | 0.000311  |
| N | 0.364568  | 1.986015  | -0.000203 |
| C | -2.526257 | -0.258722 | -0.000079 |
| O | -3.508934 | 0.498066  | 0.000515  |
| N | -2.611704 | -1.628617 | 0.000064  |
| H | -3.535242 | -2.050698 | 0.000459  |
| H | -1.777739 | -2.213153 | -0.000102 |
| N | 2.440540  | 0.857285  | -0.000069 |

|   |          |           |           |
|---|----------|-----------|-----------|
| C | 3.315799 | -0.188208 | 0.000230  |
| H | 2.830627 | 1.800153  | -0.000149 |
| O | 3.012753 | -1.392195 | 0.000611  |
| H | 4.369996 | 0.147393  | 0.000446  |
| H | 1.352312 | -1.771287 | -0.000204 |
| O | 0.358526 | -1.643315 | -0.000628 |

c-P35<sub>syn</sub> monomer  
HF = -638.8896725

|   |           |           |           |
|---|-----------|-----------|-----------|
| C | 1.036922  | 0.767755  | 0.000022  |
| C | 0.104822  | -0.275187 | -0.000008 |
| C | -1.174533 | 0.373645  | -0.000016 |
| N | 0.293567  | 1.932742  | 0.000093  |
| H | 0.633228  | 2.890001  | 0.000160  |
| O | 0.297636  | -1.626213 | -0.000048 |
| N | -1.042086 | 1.716859  | 0.000037  |
| C | -2.553009 | -0.235706 | -0.000032 |
| O | -3.579902 | 0.443334  | -0.000119 |
| N | -2.563440 | -1.614557 | 0.000069  |
| H | -3.468817 | -2.074338 | 0.000054  |
| H | -1.706955 | -2.164852 | 0.000143  |
| N | 2.450726  | 0.818947  | 0.000066  |
| C | 3.316219  | -0.245410 | 0.000007  |
| H | 2.879969  | 1.743262  | 0.000197  |
| O | 2.989104  | -1.438241 | -0.000109 |
| H | 4.374233  | 0.079580  | 0.000045  |
| H | 1.279749  | -1.793224 | -0.000089 |

a-P35 trimer  
HF = -1184.7843517

|   |           |           |          |
|---|-----------|-----------|----------|
| C | 3.583599  | -0.163057 | 0.000000 |
| C | 4.062000  | 1.160534  | 0.000000 |
| C | 2.899835  | 1.973482  | 0.000000 |
| N | 1.778886  | 1.193223  | 0.000000 |
| N | 2.214911  | -0.098962 | 0.000000 |
| H | 5.100138  | 1.474818  | 0.000000 |
| H | 1.509549  | -0.872315 | 0.000000 |
| H | 5.473291  | -1.196368 | 0.000000 |
| H | 3.651365  | 3.897368  | 0.000000 |
| H | 0.000000  | 1.743246  | 0.000000 |
| C | -1.650918 | 3.184157  | 0.000000 |
| C | -3.036462 | 2.937236  | 0.000000 |
| C | -3.159901 | 1.524341  | 0.000000 |
| N | -1.923951 | 0.943202  | 0.000000 |
| N | -1.022556 | 1.966608  | 0.000000 |
| H | -3.827443 | 3.679394  | 0.000000 |
| H | -1.698792 | 5.337485  | 0.000000 |
| H | -5.202065 | 1.213266  | 0.000000 |
| H | -1.514600 | -0.872120 | 0.000000 |
| C | -1.932931 | -3.023225 | 0.000000 |
| C | -1.024151 | -4.097928 | 0.000000 |
| C | 0.259959  | -3.495606 | 0.000000 |
| N | 0.142368  | -2.134885 | 0.000000 |
| N | -1.195048 | -1.868821 | 0.000000 |

|   |           |           |          |
|---|-----------|-----------|----------|
| H | -1.268756 | -5.154621 | 0.000000 |
| H | -3.773128 | -4.142900 | 0.000000 |
| H | 1.553716  | -5.105778 | 0.000000 |
| N | 2.809000  | 3.339504  | 0.000000 |
| H | 1.897685  | 3.803832  | 0.000000 |
| C | 4.374367  | -1.382216 | 0.000000 |
| O | 3.942775  | -2.540602 | 0.000000 |
| O | -4.170691 | -2.144780 | 0.000000 |
| O | 0.229966  | 4.681927  | 0.000000 |
| C | -0.989224 | 4.477988  | 0.000000 |
| C | -3.384163 | -3.098450 | 0.000000 |
| N | 1.489582  | -4.097474 | 0.000000 |
| N | -4.297696 | 0.762773  | 0.000000 |
| H | -4.244299 | -0.258577 | 0.000000 |
| H | 2.346409  | -3.538808 | 0.000000 |

a-P35<sub>syn</sub> trimer

HF = -1184.7848652

|   |           |           |          |
|---|-----------|-----------|----------|
| C | 1.968686  | -2.950745 | 0.000000 |
| C | 1.116704  | -4.065373 | 0.000000 |
| C | -0.198957 | -3.519852 | 0.000000 |
| N | -0.178841 | -2.161069 | 0.000000 |
| N | 1.149028  | -1.843252 | 0.000000 |
| N | 3.328858  | -2.839893 | 0.000000 |
| C | -1.425260 | -4.311503 | 0.000000 |
| O | -2.586645 | -3.890496 | 0.000000 |
| H | 1.398674  | -5.112340 | 0.000000 |
| H | 1.453516  | -0.838836 | 0.000000 |
| H | 3.788734  | -1.922481 | 0.000000 |
| H | 3.893643  | -3.678316 | 0.000000 |
| H | -1.241277 | -5.411837 | 0.000000 |
| H | -1.452540 | -0.837557 | 0.000000 |
| C | -3.539514 | -0.228923 | 0.000000 |
| C | -4.079406 | 1.066023  | 0.000000 |
| C | -2.949529 | 1.933121  | 0.000000 |
| N | -1.782671 | 1.236780  | 0.000000 |
| N | -2.170638 | -0.072326 | 0.000000 |
| N | -4.123656 | -1.462241 | 0.000000 |
| C | -3.021856 | 3.390959  | 0.000000 |
| O | -2.076266 | 4.185911  | 0.000000 |
| H | -5.127308 | 1.344518  | 0.000000 |
| H | -3.559309 | -2.319333 | 0.000000 |
| H | -5.132180 | -1.531697 | 0.000000 |
| H | -4.066677 | 3.781943  | 0.000000 |
| H | 0.000000  | 1.676488  | 0.000000 |
| C | 1.570791  | 3.179075  | 0.000000 |
| C | 2.962163  | 2.998958  | 0.000000 |
| C | 3.148054  | 1.586937  | 0.000000 |
| N | 1.961498  | 0.924653  | 0.000000 |
| N | 1.021882  | 1.915328  | 0.000000 |

|   |           |           |          |
|---|-----------|-----------|----------|
| N | 0.794743  | 4.301610  | 0.000000 |
| C | 4.447058  | 0.921213  | 0.000000 |
| O | 4.663631  | -0.294986 | 0.000000 |
| H | 3.727423  | 3.767079  | 0.000000 |
| H | -0.229741 | 4.241443  | 0.000000 |
| H | 1.238696  | 5.209822  | 0.000000 |
| H | 5.307560  | 1.631220  | 0.000000 |

b-P35 trimer

HF = -1691.0536436

|   |           |           |           |
|---|-----------|-----------|-----------|
| C | 1.687606  | 3.212321  | 0.015955  |
| C | 0.694148  | 4.199014  | 0.008465  |
| C | -0.520713 | 3.477314  | -0.007846 |
| N | 1.052511  | 1.998175  | 0.003917  |
| H | 1.458407  | 1.037820  | 0.001588  |
| H | 0.788892  | 5.276258  | 0.012871  |
| N | -0.301560 | 2.137861  | -0.010306 |
| C | 3.162035  | 3.343354  | 0.031773  |
| O | 3.936622  | 2.368460  | 0.031289  |
| N | 3.638932  | 4.627084  | 0.047177  |
| H | 4.645146  | 4.764446  | 0.057236  |
| H | 3.025979  | 5.435455  | 0.048212  |
| N | -1.828912 | 3.960369  | -0.020661 |
| C | -2.184142 | 5.294036  | -0.018707 |
| H | -2.590117 | 3.261741  | -0.032634 |
| O | -1.410304 | 6.250795  | -0.005392 |
| H | -3.289224 | 5.405593  | -0.030753 |
| H | -6.456039 | 1.635564  | -0.006488 |
| O | -4.025286 | 2.222701  | -0.048547 |
| N | -5.832267 | 0.834144  | 0.004422  |
| C | -4.482297 | 1.064547  | -0.018406 |
| H | -6.224763 | -0.101358 | 0.028869  |
| C | -3.630383 | -0.146267 | -0.006534 |
| H | -1.634695 | 0.745842  | -0.024459 |
| N | -2.261542 | -0.086749 | -0.018175 |
| C | -3.985708 | -1.500412 | 0.011088  |
| H | -4.965526 | -1.957907 | 0.020855  |
| N | -1.702790 | -1.328405 | -0.005897 |
| C | -2.752016 | -2.189674 | 0.010061  |
| O | -4.706551 | -4.349719 | 0.063208  |
| N | -2.515073 | -3.563524 | 0.022875  |
| C | -3.490696 | -4.539403 | 0.047555  |
| H | -1.529256 | -3.872427 | 0.008090  |
| H | -3.033765 | -5.551398 | 0.052424  |
| O | 6.120557  | -1.901062 | -0.007188 |
| C | 5.678229  | -0.752808 | -0.001651 |
| H | 6.327390  | 0.147911  | 0.005494  |
| N | 4.345605  | -0.394844 | -0.003645 |
| H | 4.179066  | -3.318202 | -0.014576 |
| C | 3.292542  | -2.698916 | -0.014044 |
| C | 3.273801  | -1.286232 | -0.009088 |
| H | 3.198322  | -5.338447 | -0.014430 |
| H | 4.120545  | 0.613529  | 0.004689  |
| N | 2.191615  | -5.464513 | -0.019250 |

|   |          |           |           |
|---|----------|-----------|-----------|
| C | 1.941612 | -3.067073 | -0.017842 |
| C | 1.318170 | -4.409557 | -0.022117 |
| N | 2.003395 | -0.807417 | -0.009558 |
| H | 1.807748 | -6.404733 | -0.022623 |
| N | 1.206405 | -1.910733 | -0.015947 |
| O | 0.086536 | -4.592183 | -0.027808 |
| H | 0.171948 | -1.783222 | -0.015498 |

b-P35<sub>syn</sub> trimer

HF = -1691.0497477

|   |           |           |           |
|---|-----------|-----------|-----------|
| C | -2.689325 | -2.311295 | -0.026832 |
| C | -2.197188 | -3.616610 | -0.040569 |
| C | -0.785091 | -3.463868 | -0.035969 |
| N | -1.604150 | -1.471454 | -0.015906 |
| H | -1.620902 | -0.424003 | -0.002361 |
| H | -2.809552 | -4.507760 | -0.045640 |
| N | -0.425091 | -2.156362 | -0.020738 |
| C | 0.240274  | -4.542538 | -0.047020 |
| O | 1.468036  | -4.343385 | 0.011221  |
| N | -0.251697 | -5.818955 | -0.126764 |
| H | 0.411330  | -6.588232 | -0.130751 |
| H | -1.244137 | -6.020028 | -0.182186 |
| N | -3.981853 | -1.806076 | -0.020610 |
| C | -5.124461 | -2.587134 | -0.019733 |
| H | -4.101096 | -0.774941 | -0.003215 |
| O | -5.154933 | -3.815122 | -0.031812 |
| H | -6.034112 | -1.951955 | -0.006351 |
| N | 3.551933  | -2.542154 | 0.111661  |
| C | 3.345507  | -1.170886 | 0.057939  |
| N | 2.076814  | -0.648455 | 0.018725  |
| H | 1.176752  | -1.183694 | 0.007299  |
| N | 2.084740  | 0.714287  | -0.037604 |
| C | 3.397988  | 1.053006  | -0.031113 |
| C | 3.824304  | 2.478041  | -0.087219 |
| N | 5.178992  | 2.684058  | -0.120735 |
| H | 5.848582  | 1.922244  | -0.119850 |
| H | 5.517056  | 3.640897  | -0.158811 |
| O | 3.039225  | 3.444676  | -0.104277 |
| H | 2.718327  | -3.160952 | 0.091949  |
| C | 4.798373  | -3.142866 | 0.142838  |
| H | 4.701272  | -4.248008 | 0.168800  |
| O | 5.878310  | -2.557180 | 0.143295  |
| C | 4.232716  | -0.094562 | 0.028892  |
| H | 5.310281  | -0.181843 | 0.051845  |
| N | -1.663175 | 1.445216  | 0.020508  |
| N | -0.478569 | 2.120311  | -0.003476 |
| H | 0.435017  | 1.608459  | -0.021252 |
| C | -0.659620 | 3.480475  | 0.000135  |
| N | 0.425806  | 4.344919  | -0.024818 |
| H | 1.377884  | 3.931497  | -0.051608 |
| C | 0.323224  | 5.725359  | -0.019945 |
| H | 1.328822  | 6.193640  | -0.047684 |
| O | -0.723254 | 6.367766  | 0.010120  |
| C | -2.035443 | 3.710905  | 0.028738  |



|   |           |          |          |
|---|-----------|----------|----------|
| H | -2.497882 | 4.688281 | 0.034501 |
| C | -2.612780 | 2.413180 | 0.040234 |
| C | -4.060419 | 2.067720 | 0.065422 |
| N | -4.917447 | 3.136058 | 0.109627 |
| H | -4.593032 | 4.096660 | 0.130635 |
| H | -5.915713 | 2.949639 | 0.119329 |
| O | -4.503804 | 0.904093 | 0.046637 |

c-P35 trimer

HF = -1916.8184387

|   |           |           |           |
|---|-----------|-----------|-----------|
| C | -2.864994 | -2.037706 | -0.006382 |
| C | -4.061321 | -1.266237 | 0.008170  |
| C | -3.624684 | 0.071259  | 0.008246  |
| N | -1.775973 | -1.232989 | -0.014460 |
| C | -4.407138 | 1.317517  | 0.015482  |
| O | -3.880529 | 2.453635  | 0.009183  |
| N | -5.763188 | 1.159808  | 0.029427  |
| H | -6.338529 | 1.996618  | 0.034695  |
| H | -6.189191 | 0.232757  | 0.031952  |
| N | -2.671949 | -3.432189 | -0.012406 |
| C | -3.631727 | -4.392624 | -0.007089 |
| H | -1.684301 | -3.762768 | -0.019591 |
| O | -4.867925 | -4.214850 | 0.002800  |
| H | -3.199510 | -5.408056 | -0.012711 |
| N | -1.637746 | 4.020053  | -0.020115 |
| C | -0.332074 | 3.494657  | -0.006832 |
| N | -0.175578 | 2.149628  | 0.005301  |
| C | 1.875532  | 3.104923  | 0.012944  |
| C | 3.346290  | 3.165907  | 0.024661  |
| N | 3.878784  | 4.423492  | 0.018913  |
| H | 3.281197  | 5.250750  | 0.008742  |
| H | 4.890033  | 4.513175  | 0.028474  |
| O | 4.071855  | 2.145424  | 0.039360  |
| H | -2.415690 | 3.327240  | -0.012012 |
| C | -1.995232 | 5.330131  | -0.029293 |
| H | -3.091594 | 5.458046  | -0.034884 |
| O | -1.227394 | 6.314942  | -0.032172 |
| C | 0.932026  | 4.148492  | -0.003080 |
| N | 1.956654  | -0.921754 | -0.016182 |
| C | 3.198077  | -1.461776 | -0.009428 |
| N | 4.308000  | -0.595481 | -0.006425 |
| H | 4.099696  | 0.424830  | -0.002954 |
| C | 5.620256  | -0.944984 | -0.001918 |
| H | 6.281734  | -0.061453 | 0.000981  |
| O | 6.085586  | -2.103609 | -0.001213 |
| C | 3.128824  | -2.883623 | -0.004784 |
| C | 1.752208  | -3.175227 | -0.009345 |
| C | 1.065000  | -4.477092 | -0.004654 |
| N | 1.882754  | -5.570616 | 0.006614  |
| H | 2.898262  | -5.472233 | 0.009971  |
| H | 1.449582  | -6.489152 | 0.010587  |
| O | -0.182207 | -4.590644 | -0.009864 |
| H | 0.359939  | 5.976621  | -0.025252 |
| H | 4.996771  | -3.309073 | -0.000439 |

|   |           |           |           |
|---|-----------|-----------|-----------|
| H | -5.363976 | -2.670965 | 0.015151  |
| O | -5.361116 | -1.655620 | 0.019417  |
| O | 4.116382  | -3.814202 | 0.002854  |
| O | 1.239707  | 5.470095  | -0.012569 |
| H | 1.508557  | 0.947888  | 0.023033  |
| H | -1.571555 | 0.826411  | -0.006930 |
| H | 0.071596  | -1.774808 | -0.022058 |
| N | 1.159099  | 1.927808  | 0.018749  |
| N | -2.247224 | 0.035288  | -0.005835 |
| N | 1.094343  | -1.964320 | -0.016339 |

c-P35<sub>syn</sub> trimer

HF = -1916.806871

|   |           |           |          |
|---|-----------|-----------|----------|
| C | -1.973380 | -2.923564 | 0.000000 |
| C | -1.146910 | -4.057792 | 0.000000 |
| C | 0.181400  | -3.542419 | 0.000000 |
| N | -1.138615 | -1.834205 | 0.000000 |
| H | -1.435510 | -0.826968 | 0.000000 |
| N | 0.171349  | -2.178719 | 0.000000 |
| C | 1.445486  | -4.317474 | 0.000000 |
| O | 2.582154  | -3.793336 | 0.000000 |
| N | 1.302374  | -5.674307 | 0.000000 |
| H | 2.146323  | -6.239308 | 0.000000 |
| H | 0.379999  | -6.111453 | 0.000000 |
| N | -3.362576 | -2.746518 | 0.000000 |
| C | -4.297342 | -3.736345 | 0.000000 |
| H | -3.722457 | -1.762334 | 0.000000 |
| O | -4.078449 | -4.963737 | 0.000000 |
| H | -5.324154 | -3.331425 | 0.000000 |
| N | 4.063904  | -1.539213 | 0.000000 |
| C | 3.520887  | -0.248248 | 0.000000 |
| N | 2.159906  | -0.071166 | 0.000000 |
| H | 1.436095  | -0.832038 | 0.000000 |
| N | 1.802143  | 1.235322  | 0.000000 |
| C | 2.977554  | 1.926910  | 0.000000 |
| C | 3.015988  | 3.409096  | 0.000000 |
| N | 4.262409  | 3.964073  | 0.000000 |
| H | 5.102517  | 3.384319  | 0.000000 |
| H | 4.329343  | 4.977468  | 0.000000 |
| O | 1.993493  | 4.131072  | 0.000000 |
| H | 3.392156  | -2.343363 | 0.000000 |
| C | 5.388864  | -1.852191 | 0.000000 |
| H | 5.553124  | -2.943648 | 0.000000 |
| O | 6.341364  | -1.047695 | 0.000000 |
| C | 4.088794  | 1.035113  | 0.000000 |
| N | -1.973980 | 0.941466  | 0.000000 |
| N | -1.020417 | 1.903557  | 0.000000 |
| H | 0.000000  | 1.656401  | 0.000000 |
| C | -1.546476 | 3.171205  | 0.000000 |
| N | -0.698991 | 4.286119  | 0.000000 |
| H | 0.333296  | 4.105751  | 0.000000 |
| C | -1.089141 | 5.590434  | 0.000000 |
| H | -0.225410 | 6.277586  | 0.000000 |
| O | -2.261667 | 6.014178  | 0.000000 |

|   |           |           |          |
|---|-----------|-----------|----------|
| C | -2.942034 | 3.022695  | 0.000000 |
| C | -3.159981 | 1.614738  | 0.000000 |
| C | -4.463298 | 0.907705  | 0.000000 |
| N | -5.566924 | 1.709966  | 0.000000 |
| H | -5.484848 | 2.727386  | 0.000000 |
| H | -6.478159 | 1.261442  | 0.000000 |
| O | -4.577896 | -0.338733 | 0.000000 |
| O | 5.398435  | 1.408835  | 0.000000 |
| H | 5.947347  | 0.560692  | 0.000000 |
| O | -1.479184 | -5.378604 | 0.000000 |
| H | -2.488078 | -5.428534 | 0.000000 |
| O | -3.919461 | 3.971046  | 0.000000 |
| H | -3.458438 | 4.870012  | 0.000000 |
